# Supplementary material for: Construction of direct Z-scheme BiOBr/CuI heterojunction for boosting photocatalytic degradation of phenol
Source: Royal Society of Chemistry journal article supplement (doi:10.1039/d2cy01840c), 2022-11-28
Supplement: d2cy01840c1.pdf [file d2cy01840c1.pdf]

## Supporting Information

### **Construction of direct Z-scheme BiOBr/CuI heterojunction for boosting photocatalytic degradation of phenol**

Baiyu Liu, Xuefeng Hu\*, Junhan Yang, Chen Yang, Yao Huang

School of Environmental Science and Engineering, Shaanxi University of Science and  
Technology, Xi'an, 710021, P.R. China

\* Corresponding author: Email: [huxuefeng@sust.edu.cn](mailto:huxuefeng@sust.edu.cn) (Xuefeng Hu)

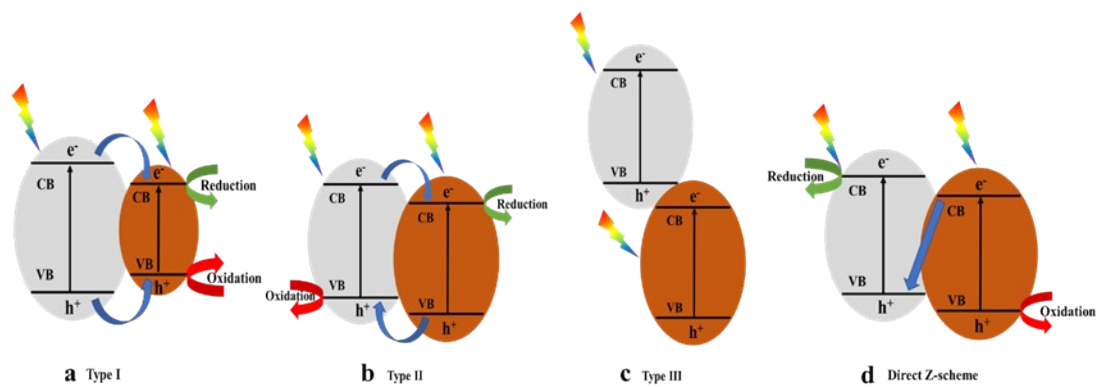

**Figure S1.** Schematic diagram of the separation of electrons and holes for three conventional heterojunctions and direct Z-scheme: (a) Type I (b) Type II (c) Type III (d) Direct Z-scheme

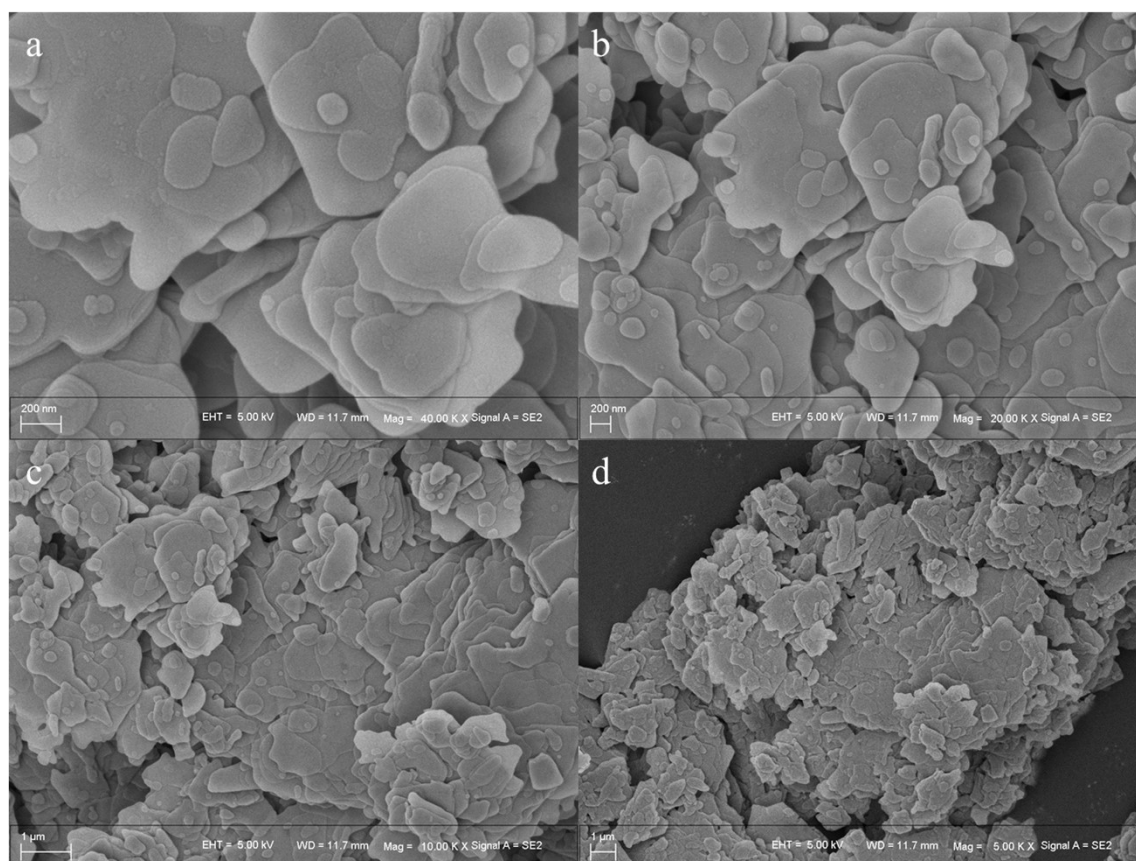

**Figure S2.** SEM images of BiOBr under 200 nm (a, b) and 1 μm (c, d)

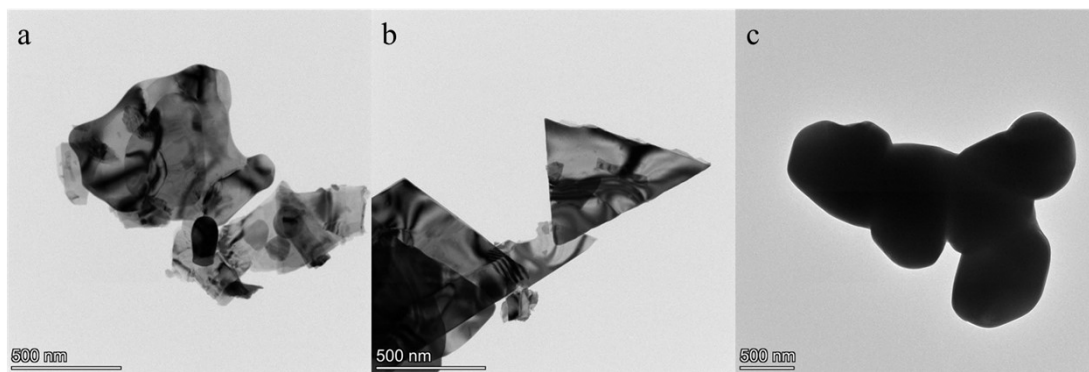

**Figure S3.** TEM images of BiOBr (a), BiOBr/CuI-1:0.8 (b) and CuI (c)

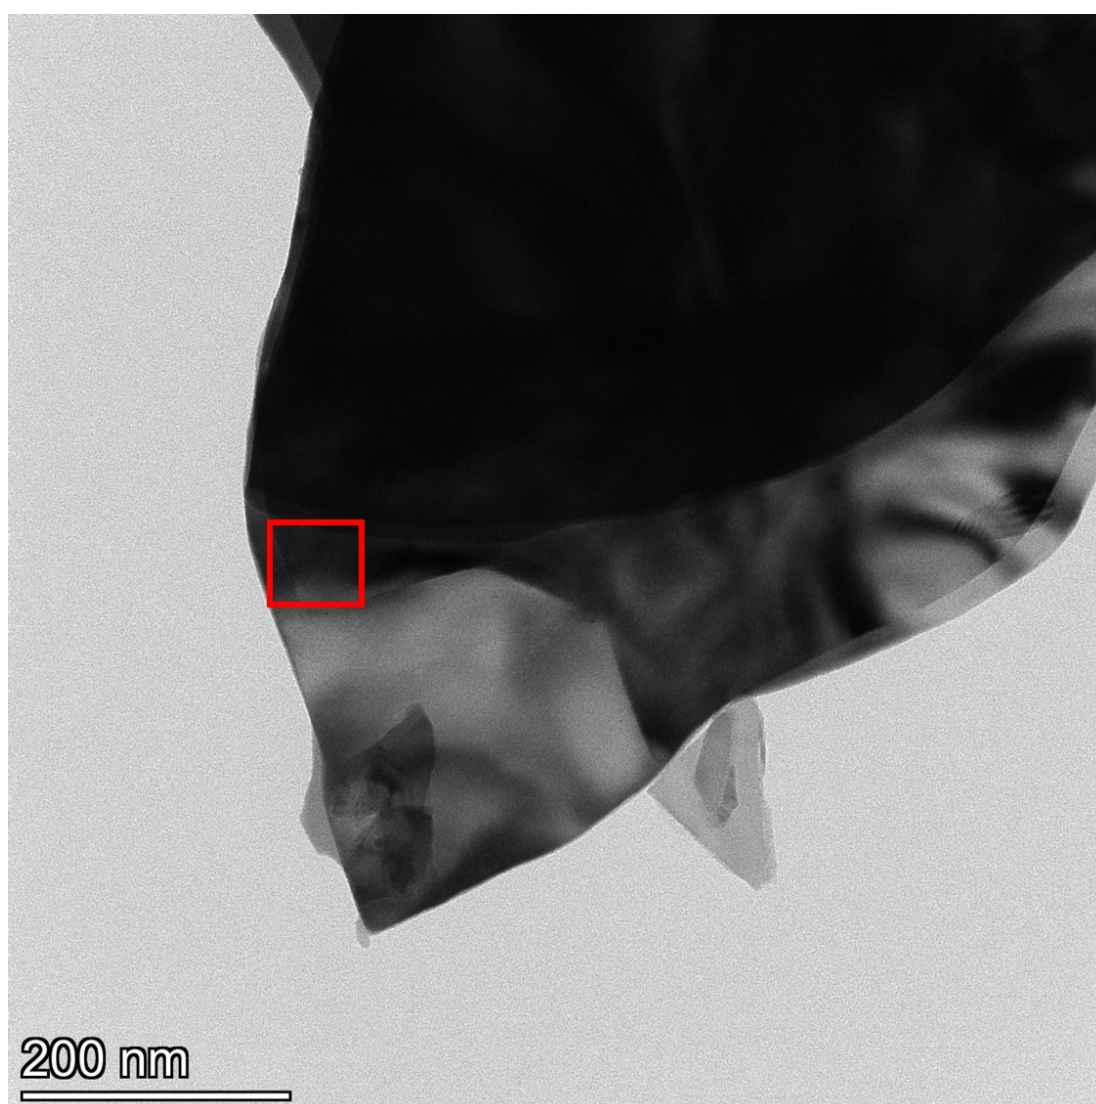

**Figure S4.** TEM image of BiOBr/CuI-1:0.8

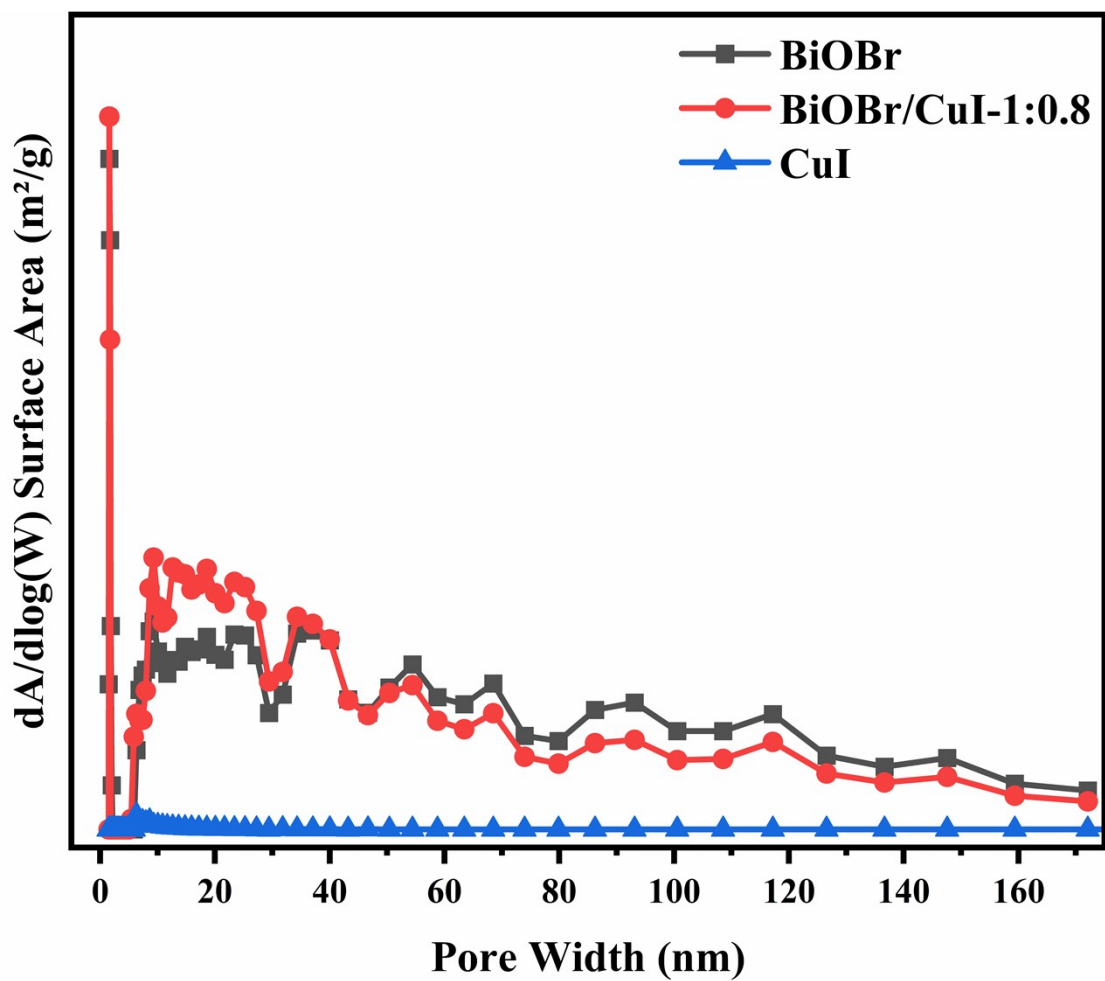

Figure S5. The pore size distribution of BiOBr, BiOBr/CuI-1:0.8 and CuI

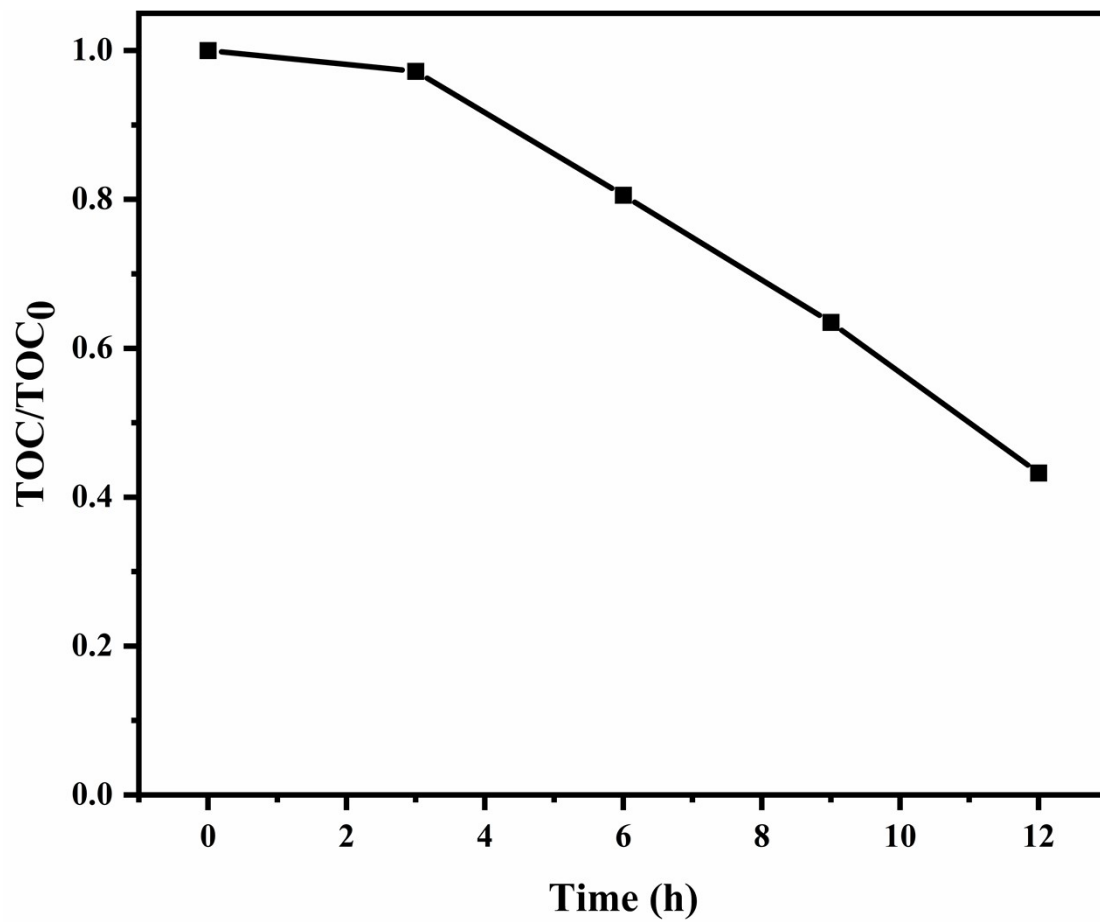

**Figure S6.** Mineralization rate of phenol degraded by BiOBr/CuI-1:0.8 for 12 hours

MS 缩放的质谱图

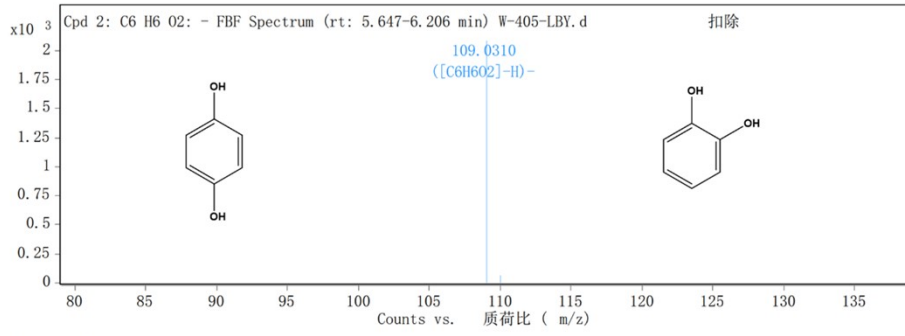

MS 缩放的质谱图

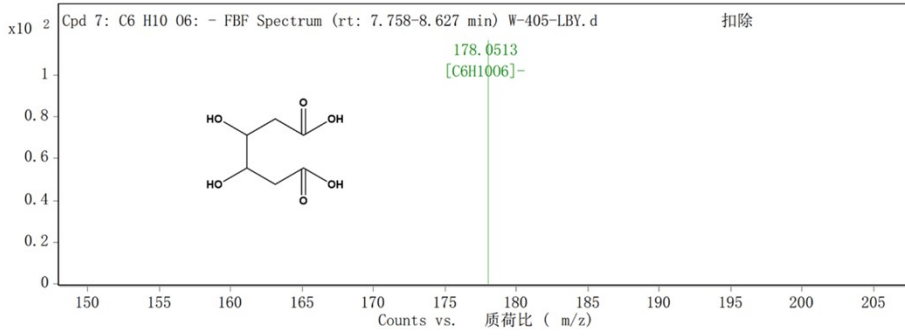

MS 缩放的质谱图

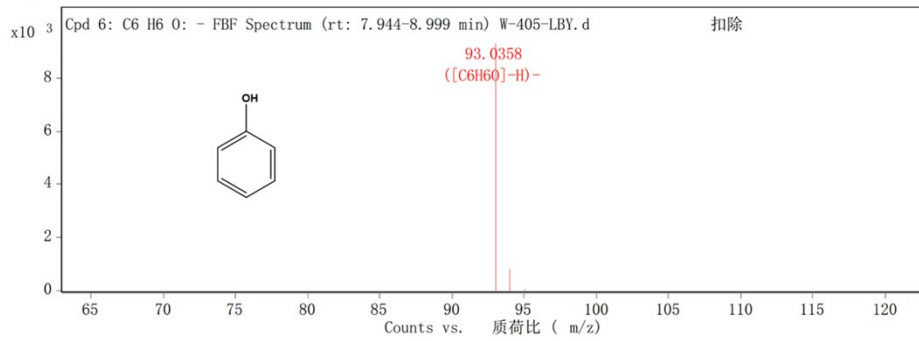

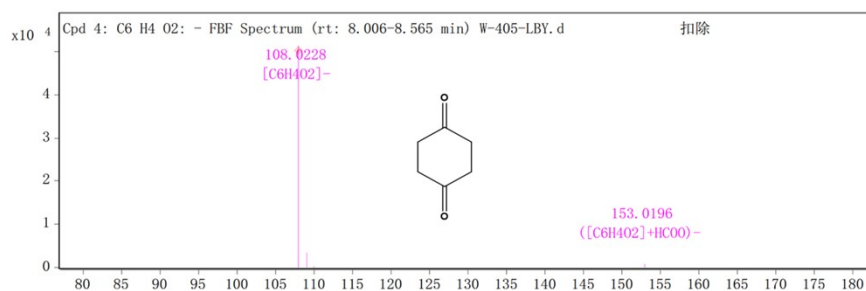

MS 缩放的质谱图

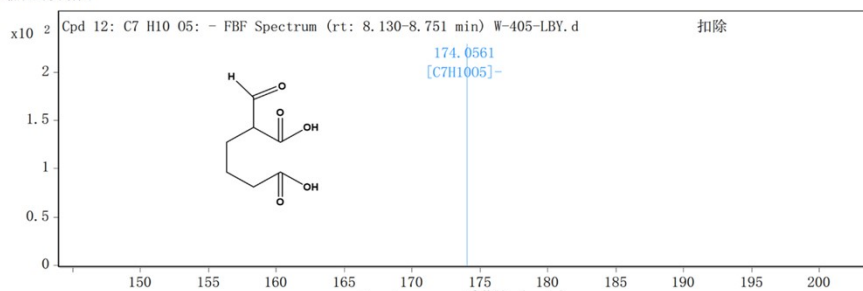

MS 缩放的质谱图

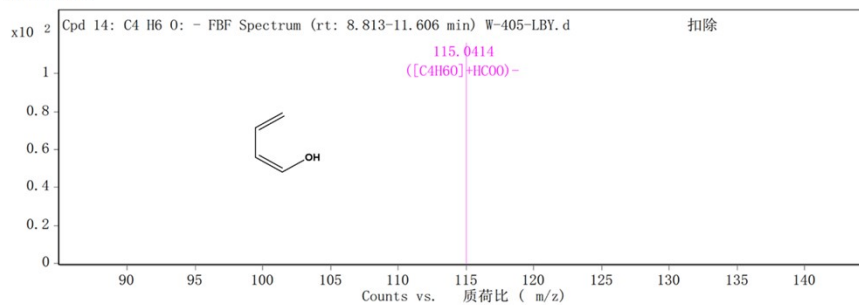

MS 缩放的质谱图

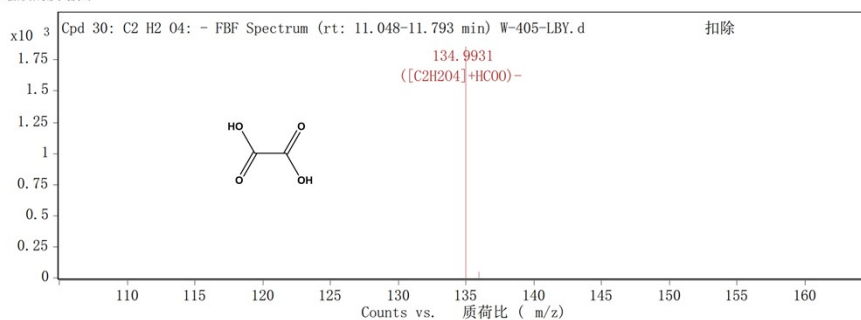

Figure S7. Results of mass spectra
